# Supplementary material for: Identification of highly oxygenated organic molecules and their role in aerosol formation in the reaction of limonene with nitrate radical
Source: Copernicus journal article supplement (doi:10.5194/acp-2022-85), 2022-02-04
Supplement: Supplementary file [file acp-2022-85-AC1-supplement.pdf]

We thank the reviewers for the helpful comments on our manuscript. The comments are greatly appreciated. We addressed all the comments and believe that the revisions based on the comments helped improve the quality of our manuscript. Below please find our responses to the comments one by one and the corresponding revisions made to the manuscript. The original comments are shown in italics. The revised parts of the manuscript are highlighted.

#### *General comments*

●*The manuscript by Guo et al present interesting results of highly oxygenated organic molecules (HOM) from the limonene+NO<sub>3</sub> system. This system is of large atmospheric relevance, yet such measurements have hardly been performed before. The experiments are of high quality, and I think the manuscript nicely fits within the scope of ACP. I have several questions and comments to the authors, as outlined below, with my major concern being the interpretation of some of the results.*

#### **Response:**

We thank the reviewer for the kind remarks.

#### *Specific comments*

●*Lines 110-127: Different instruments have been shown to have different sensitivities to molecule groups, and even CIMS instruments with different reagent ions observing the same elemental composition can often show totally different temporal behavior. Considering this, the different reported HOMs in these papers might not be the same thing. It might be useful to group the papers in such a way that a reader knows which instrument measured the reported HOMs. In addition, I think Yan et al. (2016) (<https://doi.org/10.5194/acp-16-12715-2016>) could also be mentioned when discussing reported NO<sub>3</sub>-induced HOM.*

#### **Response:**

Accepted. This part of literature review is in the order of from field campaigns to laboratory studies. In the revised manuscript, the instruments used to detect HOM in each work have been added as follows:

“In the SOAS campaign, HOM-ONs (organic nitrates) were identified in both gas and particle phase using a NO<sub>3</sub><sup>-</sup>-Chemical Ionization time-of-flight Mass Spectrometer (CI-APi-TOF) and a High Resolution Time-of-Flight Chemical Ionization Mass Spectrometer (HR-ToF-CIMS) coupled to a Filter Inlet for Gases and AEROSols (FIGAERO). Species with the sum formula C<sub>10</sub>H<sub>15,17,19</sub>NO<sub>4-11</sub> were observed which are formed through the oxidation of monoterpenes by NO<sub>3</sub> (Lee et al., 2016; Massoli et al., 2018). ... Boyd et al. (2015) observed C<sub>10</sub>H<sub>17</sub>NO<sub>4/5</sub> and C<sub>10</sub>H<sub>15</sub>NO<sub>5/6</sub> in the gas phase in β-pinene + NO<sub>3</sub> experiments using a quadrupole chemical ionization mass spectrometer with I<sup>-</sup> as the reagent ion (I<sup>-</sup>-CIMS). They proposed possible

formation schemes of these ONs. Nah et al. (2016) further detected 5 and 41 HOM-ONs in the  $\text{NO}_3$  oxidation of  $\alpha$ -pinene and  $\beta$ -pinene, respectively, such as  $\text{C}_{10}\text{H}_{15/17/19}\text{NO}_{4-9}$  in the gas- and particle-phase using  $\Gamma$ -FIGAERO HR-ToF-CIMS. Claflin and Ziemann (2018) provided formation mechanisms for HOM-ONs via gas-phase and particle-phase reactions in the  $\beta$ -pinene +  $\text{NO}_3$  reaction system, where particle-phase products were analyzed using reversed-phase high-performance liquid chromatography equipped with a UV-vis photodiode array detector (HPLC-UV), Electron-Ionization Thermal Desorption Particle Beam Mass Spectrometer (EI-TDPBMS), Chemical Ionization Finnigan PolarisQ Ion Trap Mass Spectrometer (CI-ITMS), and Electrospray-Ionization Mass Spectrometer (ESI-MS). Recently, Shen et al. (2021) found a large number of HOM (>150 species) in the  $\beta$ -pinene +  $\text{NO}_3$  reaction using  $\text{NO}_3^-$ -CI-APi-TOF. HOM formed in the reaction of four monoterpenes ( $\alpha$ -Pinene,  $\beta$ -pinene,  $\Delta$ -3-carene, and  $\alpha$ -thujene) with  $\text{NO}_3$  were also detected using  $\text{NO}_3^-$ -CI-APi-TOF by Dam et al. (2022). Bell et al. (2021) found that dimer dinitrates ( $\text{C}_{20}\text{H}_{32}\text{N}_2\text{O}_{8-13}$ ) contribute a large portion to SOA from  $\alpha$ -pinene +  $\text{NO}_3$  and also detected monomer ON such as  $\text{C}_{10}\text{H}_{15}\text{NO}_{5-10}$  and  $\text{C}_{10}\text{H}_{14,16}\text{N}_2\text{O}_{7-11}$  using FIGAERO-CIMS and an Extractive ElectroSpray Ionization time-of-flight mass spectrometer (EESI-ToF-MS). The detailed speciation depends on analytical method to some extent, though. Moreover, the HOM composition in the particle-phase was found to depend on aging time and reaction conditions such as dark versus light (Bell et al., 2021; Wu et al., 2021). .....Regarding the HOM formation in the reaction of limonene with  $\text{NO}_3$ , Faxon et al. (2018) reported a series of HOM in the particle phase, including  $\text{C}_{7-10}$  monomers with 3-11 oxygen atoms and  $\text{C}_{11-20}$  dimers with 5-19 oxygen atoms using  $\Gamma$ -FIGAERO HR-ToF-CIMS.”

The paper by Yan et al. (2016) has been also added to the manuscript. The revised text reads as follows:

“In a campaign in a boreal forest in Hyytiälä, measurement using a  $\text{NO}_3^-$ -CI-APi-TOF and positive matrix factor (PMF) analysis showed a nighttime factor of HOM-ON formed via  $\text{NO}_3$  oxidation of monoterpenes (Yan et al., 2016).”

●*Fig. 1: Please multiply the  $\text{NO}_3$  time trace by (at least) 10 to make the values legible.*

**Response:**

Accepted. In the revised manuscript, Fig. 1a has been modified in which  $\text{NO}_3$  concentrations are multiplied by 10 (also shown below), and show similar pattern as  $\text{N}_2\text{O}_5$ :

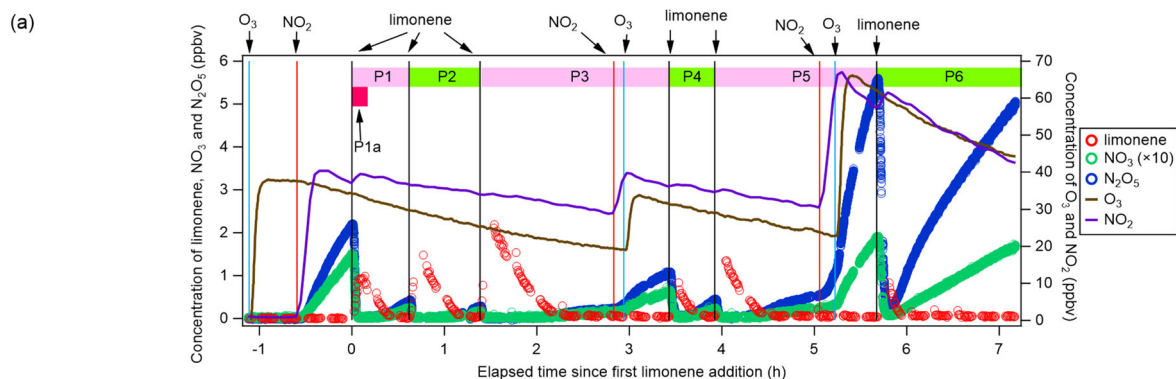

●Line 162: Do you expect that isoprene would be left on the walls? Is it possible that SVOC isoprene oxidation products are coming off the walls instead?

**Response:**

We do not expect that isoprene is left on the walls because its volatility is very high. Instead, we indeed believe that some peaks we identified are likely SVOC isoprene oxidation products left on the walls, such as  $C_5H_{10}N_2O_8$  mentioned in our manuscript. In the revised manuscript, we have further clarified this point to avoid potential misunderstanding as follows:

“We observed several peaks which were obviously products from the isoprene +  $NO_3$  reaction, such as  $C_5H_{10}N_2O_8 \cdot ^{15}NO_3^-$  at m/z 289. Such peaks were present before the limonene oxidation reaction started, suggesting that these compounds preexisted in the chamber. These isoprene oxidation products were likely formed in an isoprene +  $NO_3$  experiment performed two days before (Zhao et al., 2021) and released slowly from chamber walls due to their semi-volatile character.”

●When discussing the atmospheric relevance of this work, I think the authors should reference their conditions to the findings by Bates et al. (2021) (<https://doi.org/10.5194/acp-22-1467-2022>).

**Response:**

Accepted. We have revised the discussion regarding the ambient relevance and referred to the finding of Bates et al. (2022) as follows.

“The  $RO_2\cdot$  loss pathway in our study was dominated by the reactions  $RO_2\cdot + NO_3$  and  $RO_2\cdot + RO_2\cdot$ , which is relevant for the  $RO_2\cdot$  fate in urban areas and forested areas influenced by an urban plume at nighttime. However, in more pristine forested regions, the  $RO_2\cdot$  fate is mostly determined by  $RO_2\cdot + HO_2$  and  $RO_2\cdot + RO_2\cdot$ , as shown by Bates et al. (2022) for the example of a Southeast US forest. As  $NO_3$

concentration is generally enhanced with increased anthropogenic emissions,  $\text{RO}_2\cdot + \text{NO}_3$  will become more important going from remote to urban areas. Therefore, the HOM products and their formation process in our study are relevant for rural and forested regions influenced by anthropogenic plumes and ambient urban regions with high volatile commercial products emissions as limonene is a typical component of volatile chemical products (VCP) (Nazaroff and Weschler, 2004). In these regions, HOM from monoterpene +  $\text{NO}_3$  reactions can be major components of nighttime SOA. As nitrooxy- $\text{RO}_2$  fate can strongly affect the oxidation product distribution and SOA yield as shown for the reaction of  $\alpha$ -pinene and  $\text{NO}_3$  (Bates et al., 2022), more studies of HOM formation by  $\text{NO}_3$  at various  $\text{RO}_2\cdot$  fates are needed to be representative of various environment including (remote) forested regions.”

We have also cited Bates et al. (2022) in the introduction section, as well as several other places.

● I find that including some high resolution fits is very helpful for a reader to assess the certainty of peak assignments, and therefore suggest that some examples be included. Ranging from ions that are unambiguous to ions that are on the limit of what you included in the paper. For example, the conclusions mention trimers with six N-atoms, and the quality of these fits would be interesting to see.

#### Response:

Accepted. We have added two examples of high resolution peak fitting, representing unambiguous ions and ion on the limit of the resolution, respectively, in the supplement of the revised manuscript (Fig. S14), which are also shown below:

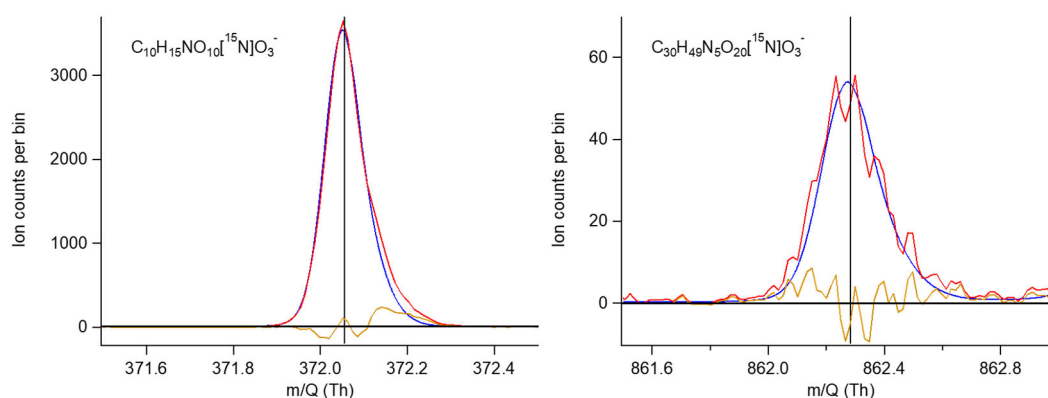

Figure S14. Examples of high resolution peak fitting of HOM containing 1 N atom (left panel) and 5 N atoms (right panel). Red lines are the mass spectrum, blue and orange lines show the sum of the isotopic contributions and the fitted peaks, and the residuals, respectively. The black vertical lines denote the exact mass of the fitted peaks.

●It is many times stated that "carbonyl products outnumbered hydroxyl products, indicating the importance of the unimolecular RO<sub>2</sub> termination pathway". This may be true, but I would like to see some estimate of the importance of RO<sub>2</sub>+RO<sub>2</sub>->RO+RO followed by RO+O<sub>2</sub>->R=O+HO<sub>2</sub>. I also don't know why the RO-forming reactions are not included in the list of reactions starting on line 96. It is after all typically the dominant pathway.

**Response:**

We agree that the pathway RO<sub>2</sub>•+RO<sub>2</sub>•→RO•+RO• followed by RO•+O<sub>2</sub>→R=O+HO<sub>2</sub> may have some limited importance. We have added this pathway in our manuscript. However, the fragmentation and isomerization of RO• is also important especially for large RO• radicals with multiple functional groups. In the revised manuscript, we have added the following discussion.

"Among 1N-C10 monomers, concentrations of carbonyl compounds were much higher than the sum of hydroxy- and hydroperoxy-substituted compounds (Table 1). ... This finding is likely attributed to unimolecular termination reactions of RO<sub>2</sub>•, although reaction paths via RO• also cannot be excluded. Smaller unbranched RO• tend to react with O<sub>2</sub> forming carbonyl compounds while for larger or branched RO•, isomerization can also form carbonyl compounds and is a more energetically favorable and thus faster pathway compared with the reaction with O<sub>2</sub> (Ziemann and Atkinson, 2012)."

In our original manuscript, we only listed the reactions of RO<sub>2</sub>• forming close-shell product. We have also added the reaction of RO<sub>2</sub>• to RO• in the revised manuscript.

"The bimolecular reactions of HOM-RO<sub>2</sub>• with RO<sub>2</sub>•, HO<sub>2</sub>• and NO lead to highly oxidized closed shell products including carbonyls, hydroperoxides, alcohols, or organic nitrates as termination groups (R1 to R3), or form accretion products (R4) (Ehn et al., 2014; Mentel et al., 2015). Unimolecular termination reactions of HOM-RO<sub>2</sub>• lead to carbonyls or epoxides (R5 to R6) (Crouse et al., 2013). On the other hand, reactions of HOM-RO<sub>2</sub>• with NO, RO<sub>2</sub>•, NO<sub>3</sub> at nighttime can lead to alkoxy radicals as chain propagating steps (R7 to R9):"

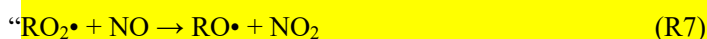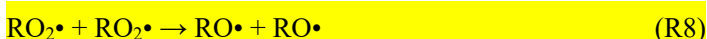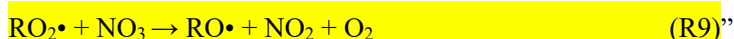

●Lines 189-190: " a large fraction of limonene was already reacting away during the VOC injection before it was homogeneously mixed in the chamber." It took me a while to understand what this meant. But it then also raises the question that if all the HOM yields are determined from the first 3 minutes after injection, what is the influence of incomplete mixing? This will impact both the limonene + NO<sub>3</sub> reactions, the RO<sub>2</sub> fates, and the amount of HOM measured, if there are "hotspots" in the chamber with clearly higher

concentrations. Was there a fan used for mixing?

**Response:**

HOM yield was calculated using the first 3 min of the experiment, because during that period particle concentration was low and 1<sup>st</sup>-generation reactions dominated. A fan was used for mixing during the whole experiment, and time for complete mixing is ~1 min (Fuchs et al., 2013), which was further confirmed based on measured VOC concentrations. Therefore at 3 min the core of the chamber is already quite well mixed and the measured VOC consumed can be used to determine HOM yield.

In the revised manuscript, we add one sentence of regarding the chamber running.

“A fan was used for active mixing in the chamber, leading to a typical mixing time of ~ 1 min (Fuchs et al., 2013).”

●*Related to the above, I find the reported wall loss rate of HOM ( $6e-4\text{ s}^{-1}$ ) to be extremely low when comparing to any other chambers where HOM loss rates were reported, even when considering the large volume of SAPHIR. A lifetime of almost 30 min for low-volatile species seems very surprising, especially if the chamber was actively mixed (and if it was not, then I would expect very large inhomogeneities). The long lifetime seems to be based solely on tracking one molecule, C<sub>10</sub>H<sub>15</sub>NO<sub>8</sub>, by Zhao et al (2018). At the same time, the paper by Peräkylä et al. (2020) suggests that this specific molecule (at mass 339 Th) hardly condensed in their seed addition experiments, suggesting that it may be a bad surrogate for LVOC.*

**Response:**

We thank the reviewer's comment, which made us realize a mistake in the wall loss rate originally used. The wall loss rate of  $6\times 10^{-4}\text{ s}^{-1}$  was determined for the condition when the chamber was not actively mixed by using the decay of C<sub>10</sub>H<sub>15</sub>NO<sub>8</sub> in the dark chamber in the work by Zhao et al. (2018). When the chamber was actively mixed, the wall loss is determined to be  $(2.2\pm 0.2)\times 10^{-3}\text{ s}^{-1}$ . We apologize for this mistake.

Besides C<sub>10</sub>H<sub>15</sub>NO<sub>8</sub>, we also examined the decay of other compounds, such as C<sub>10</sub>H<sub>15</sub>NO<sub>9-12</sub> (volatility in the LVOC/ELVOC range) and non-nitrated compounds such as C<sub>10</sub>H<sub>14</sub>O<sub>8-11</sub>, which all showed similar decay rates as shown below. We think that C<sub>10</sub>H<sub>15</sub>NO<sub>8</sub> can be a suitable surrogate to evaluate wall loss of HOM because in our previous study in the photooxidation of β-pinene, we found that C<sub>10</sub>H<sub>15</sub>NO<sub>8</sub> condensed on the particles with a high uptake coefficient of ~0.3. The difference between our study and that by Peräkylä et al. (2020) may be attributed to different particle surface concentration, which is beyond the scope of this study.

The lower wall loss rate in SAPHIR chamber during active mixing is comparable to other chambers

such as those reported by Peräkylä et al. (2020) (lifetime  $\sim 400$  s) and Krechmer et al. (2016) (lifetime  $\sim 7$ -13 min). We would like to note that the SAPHIR chamber is much larger than other chambers ( $270\text{ m}^3$  vs a few  $\text{m}^3$ ) and also the chamber is running in batch mode instead of continuous flow mode used for many other chambers for HOM studies such as our JPAC (Ehn et al., 2014; Pullinen et al., 2020) or COALA chamber (Peräkylä et al., 2020). The large volume and batch running mode may result in a thicker boundary layer of the chamber wall, which delays vapor wall deposition.

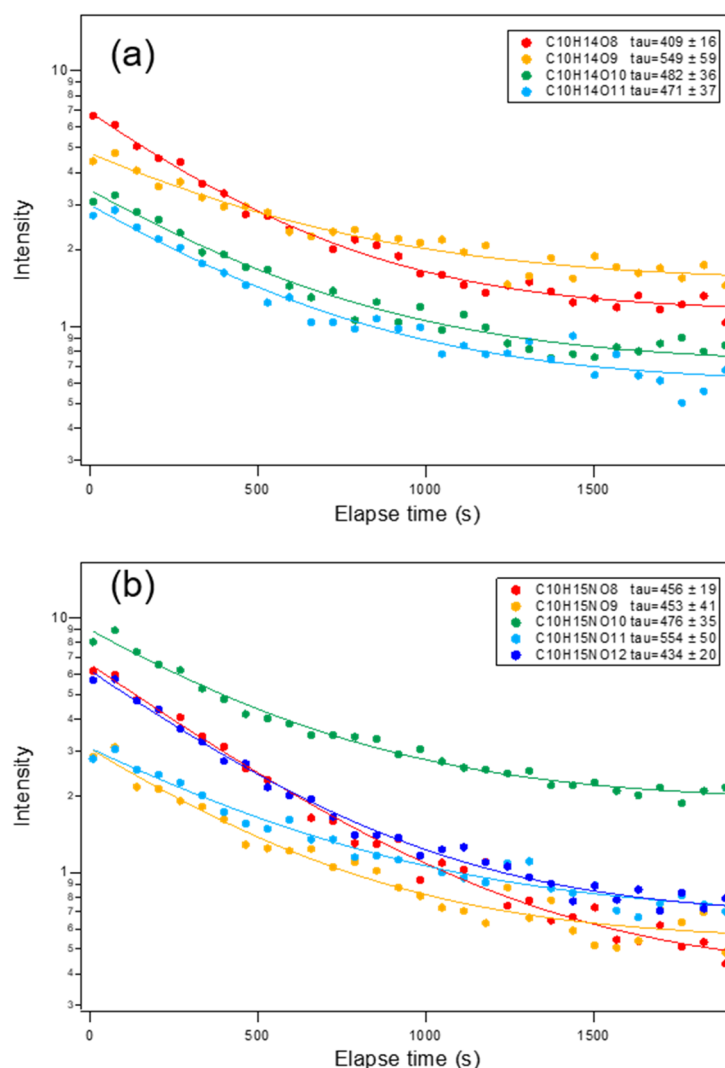

Figure S15. Decay of HOM C<sub>10</sub>H<sub>14</sub>O<sub>8-11</sub> (a) and C<sub>10</sub>H<sub>15</sub>NO<sub>9-12</sub> (b) due to wall loss during active mixing in SAPHIR chamber. The lifetimes ( $\tau$ ) of wall loss of each species are shown.

In the revised manuscript, we have updated the wall loss rate and added more description of the wall loss rate in the supplement.

“The concentrations of HOM were corrected for chamber wall losses, which were determined for a number of HOM similar to our previous study (Zhao et al., 2018), with details described in the supplement.

As the HOM yield was determined during the first 3 min of the experiment, we considered the wall loss rate to be constant ( $2.2 \times 10^{-3} \text{ s}^{-1}$ ) during this period.”

“When the chamber is actively mixed, the wall loss is determined to be  $(2.2 \pm 0.2) \times 10^{-3} \text{ s}^{-1}$ .”

“We examined the decay of nitrated compounds such as  $\text{C}_{10}\text{H}_{15}\text{NO}_{9-12}$  (volatility in the LVOC/ELVOC range) and non-nitrated compounds such as  $\text{C}_{10}\text{H}_{14}\text{O}_{8-11}$  in the reaction of limonene by OH in the presence of NO, which all showed similar decay rates as shown below (Fig. S15).

The wall loss rate in SAPHIR chamber during active mixing is comparable to the chambers such as those reported by Peräkylä et al. (2020) (lifetime ~400 s) and Krechmer et al. (2016) (lifetime ~7 to 13 min). We would like to note that the SAPHIR chamber is much larger than other chamber ( $270 \text{ m}^3$  vs a few  $\text{m}^3$ ) and also the chamber is running in batch mode instead of continuous flow mode used for many other chambers for HOM studies such as the COALA chamber (Peräkylä et al., 2020) or our JPAC chamber (Ehn et al., 2014; Pullinen et al., 2020). The large volume and batch running mode may result in a thicker boundary layer of the chamber wall, which delays vapor wall deposition.”

● *This also brings me to my main concern with this manuscript, namely the interpretation of the observed HOM, and in particular the time series. There are several aspects of the data that I find hard to understand. Some of them you have addressed, but I am not convinced of the speculations, and some it seems are not discussed much at all. Below a list of open questions:*

*The interpretation of first and second generation compounds: Normally it is of course true that compounds requiring one oxidant attack appear before compounds requiring two. In a situation where you would have a constant oxidant concentration and a constant HOM sink, the interpretation would be as straightforward as presented in this manuscript. However, now neither of these is true. If we focus only on P1, the  $\text{NO}_3$  concentration drops dramatically when the limonene is added, as does the  $\text{N}_2\text{O}_5$ , but after that both increase during P1. The oxidation rate of limonene is the source of primary  $\text{RO}_2$ , but this parameter (i.e.,  $\text{limonene} \cdot \text{NO}_3$ ) is not presented anywhere in the manuscript as far as I can tell. Therefore, I cannot tell what behavior I should expect for the first generation products based on the source strength. The  $\text{NO}_3$  trace is also plotted on such a scale that it is impossible to read out anything from it. This should be amended, as it is one of the most important parameters in the experiments.*

**Response:**

Accepted. In the revised manuscript, we have revised the scale of  $\text{NO}_3$  as mentioned above and shown the reaction rate of limonene with  $\text{NO}_3$  determined using measured limonene and  $\text{NO}_3$  concentration in Fig. S16e as follows. A measured time series of one typical 1<sup>st</sup>-generation product is also shown. The reaction



rate shows a clear trend similar to 1<sup>st</sup>-generation reaction products.

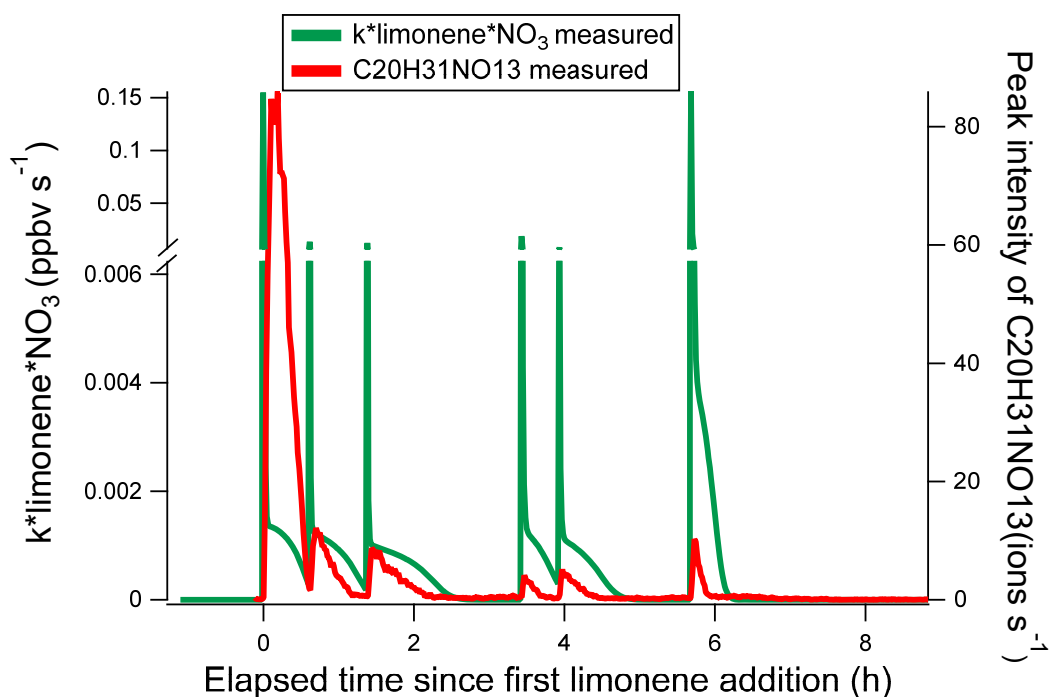

● Similarly, the sinks are always important, and as I stated above, the low wall loss rate seems questionable to me. If indeed the loss rate was so low, I would expect a continuous increase of most products throughout P1, since oxidation is still taking place. I see indication in many figures (e.g. Figs 1, S4, S9) where the drops of the initial peak for some HOM are faster than the wall loss would predict, and this despite additional production still going on, which should cause the drop to be slower than the wall loss rate.

**Response:**

We think the impression of the reviewer is mainly caused by the too low wall loss rate, given in the manuscript. The time series of a HOM is of course determined by the difference of the source strength (production rate) and sink strength (wall loss rate and further reaction of HOM with NO<sub>3</sub>). Even if a production is still taking place, “winning” wall loss rates or oxidation rates of HOM will lead to a decrease of the concentration with time rather than a continuous increase.

As mentioned above, the number given for wall loss rate was too low. With updated wall loss rate, the initial drop of the products in Fig. 1, Fig. S4, and Fig. S9 during P1 (the characteristic time of the fastest decay was 15 min, 10 min, and 13 min, respectively) can be explained by the wall loss rate as well as their potential loss by the reaction with NO<sub>3</sub> and their sources via the reaction of limonene with NO<sub>3</sub>.

In the revised manuscript, we have added the following discussion.

“The initial drop of the products in Fig. 1, Fig. S4, and Fig. S9 during P1 (the characteristic time of the fastest decay was 15 min, 10 min, and 13 min, respectively) is attributed to the balance of their sources via the reaction of limonene with NO<sub>3</sub>, their wall loss, and their potential loss by the reaction with NO<sub>3</sub>.”

●As an even clearer point relating to the production and loss dynamics, when limonene is added for the second time, many HOM (Figs 1, 4, 5, S3, and in particular S10 and S11) drop very fast, with lifetimes of minutes as far as I can tell. I believe the only time this is addressed is in conjunction with Fig 5 where it is said that this drop coincides with “the onset of particle growth” and thus indicates a role for dimers in NPF. I think the authors need to come up with a convincing line of argumentation why all these HOM seem to drop exactly at that time when limonene is added. The condensation sink does not make a dramatic jump exactly there, and many highly oxygenated monomers and dimers increase again towards the end of P2, when the CS should be still greater, suggesting that CS is not the cause of these changes. In Fig. S9 some dimers even increase dramatically at that time, to later decrease while other types of dimers increase, suggesting that changes in the source strengths are of importance. The dynamics of oxidants and RO<sub>2</sub> fates is complex, and I can only guess what is going on, but the data would to me be explainable if the loss rates were much higher than assumed in the manuscript, and the changes mainly governed by changes in source strengths, e.g. total oxidation rate, relative oxidation by O<sub>3</sub> vs NO<sub>3</sub>, and termination by NO<sub>3</sub> or RO<sub>2</sub>.

### Response:

The reviewer may have misunderstood the figures, because some details of the figures may not be clear enough. We would like to point out that a few minutes before the second limonene addition, these 2<sup>nd</sup>-generation products had already reached a peak and dropped (Fig. 1, 4, 5, S9, and S10). Therefore, at this time the drop is not related to limonene addition, and thus we explain this with close to zero source of these products at continuously growing condensational sink. We agree with the reviewer that the varying source strength is of importance here. In order to make this clearer, in the revised manuscript, we have enlarged the x-axis of Fig. 1c as follows:

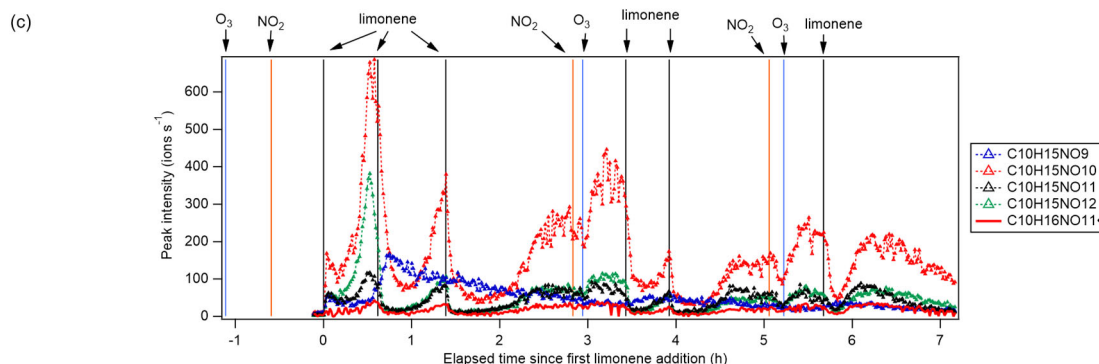

The characteristic time of the fastest decay of the HOM over the 2<sup>nd</sup> limonene addition in Fig. 1, 4, 5, S9, and S10 is 4-8 min. With the updated wall loss rate, these decays can be explained by the wall loss rate (characteristic time ~8 min) and condensation sink of vapor loss to particles calculated according to the study of Kulmala et al. (2012) (characteristic time ~13 min). The characteristic times of the fastest decay of the HOM at the end of P2 in Fig. S9 and S10 are 1.4-3.4 min, which can also be well explained by the updated wall loss rate and condensation sink of vapor loss to particles at the end of P2 (characteristic time ~1.4 min).

As for later periods (starting from P2), 2<sup>nd</sup>-generation products did not stop increasing until the next addition of limonene, indicating that the source leading to these products was strong and had overcome the condensational sink.

In the revised manuscript, we have added the following discussion.

“The characteristic time of the fastest decay of the HOM over the 2<sup>nd</sup> limonene addition in Fig. 1, 4, 5, S9, and S10 are 4-8 min. These decays can be explained by the wall loss rate (characteristic time ~8 min) and condensation sink of vapor loss to particles according to the study of Kulmala et al. (2012) (characteristic time ~13 min). The characteristic times of the fastest decay of the HOM at the end of P2 in Fig. S9 and S10 are 1.4-3.4 min, which can also be well explained by the updated wall loss rate and condensation sink of vapor loss to particles at the end of P2 (characteristic time ~1.4 min).”

●Concerning RO<sub>2</sub> fates, Fig S2 shows loss rates of RO<sub>2</sub> radicals at different times. At the same time, 6 ppb limonene was injected but only around 1 ppb is left after 5-10 min, suggesting that 5 ppb limonene (>1e11 cm<sup>-3</sup>) has reacted in this 10 min. The loss rates in Fig. S2 suggest lifetimes of around 5 min for RO<sub>2</sub> during this period, which means that there should be >1e10 cm<sup>-3</sup> RO<sub>2</sub> in the chamber, as each reacted limonene forms an RO<sub>2</sub>. This concentration seems very high. Or alternatively, the loss rate of RO<sub>2</sub> from reactions with other RO<sub>2</sub> seems very low. Have the authors considered that the RO<sub>2</sub>+RO<sub>2</sub> reactions may be faster than predicted by the MCM as they are likely to be much more functionalized than the RO<sub>2</sub> used to derive the MCM rates? Even for the primary C<sub>10</sub>H<sub>16</sub>NO<sub>5</sub> RO<sub>2</sub>, I could expect that the RO<sub>2</sub>+RO<sub>2</sub> reaction were closer to 1e-11 cm<sup>3</sup>/s as was found for the primary C<sub>10</sub>H<sub>15</sub>O<sub>4</sub> RO<sub>2</sub> from α-pinene + O<sub>3</sub> (DOI: 10.1021/acs.est.8b02210). Much higher than the ~1e-13 cm<sup>3</sup>/s given by the MCM for these radicals. How would this impact the interpretations of the manuscript?

**Response:**

MCM does not include reactions of HOM-RO<sub>2</sub>•. We agree that for more functionalized RO<sub>2</sub>•, the RO<sub>2</sub>• + RO<sub>2</sub>• reactions could be faster than the rates in MCM. However, the rate coefficients remain unknown, which on top may depend on individual RO<sub>2</sub>• formula and structure. Currently we do not see a reliable updated set of rate coefficients that are applicable to the reaction system in this study. The rate coefficient of

the self-reaction of  $C_{10}H_{15}O_4\cdot$  from  $\alpha$ -pinene +  $O_3$  is not directly applicable to  $C_{10}H_{16}NO_5\cdot$  due to their different functional groups. The concentration of  $RO_2\cdot$  reached 1.9 ppb (about  $5 \times 10^{10}$  molecule  $cm^{-3}$ ) after first limonene addition according to our simulation. If the reaction rate constants of  $RO_2\cdot + RO_2\cdot$  were higher than those used in MCM, the modeled concentrations of  $RO_2\cdot$  would be lower and relative importance of  $RO_2\cdot + RO_2\cdot$  would increase.

In the revised manuscript, we have added discussion regarding the influence of the rate of  $RO_2\cdot + RO_2\cdot$  on the  $RO_2\cdot$  fate as follows:

“We note that the MCM reaction schemes do not include the accretion reactions between  $HOM-RO_2\cdot$ . Berndt et al. (2018) determined the rate constant of accretion reaction of  $C_{10}H_{15}O_4\cdot$  formed via  $\alpha$ -pinene ozonolysis to be  $\sim 1 \times 10^{-11}$   $cm^3$  molecule $^{-1}$  s $^{-1}$ , which is of the same order as the upper limit for  $RO_2\cdot + RO_2\cdot$  reactions used in the MCM schemes for functionalized peroxy radicals such as acyl peroxy radicals (Jenkin et al., 1997; Saunders et al., 2003). However, currently we do not see a reliable updated set of rate coefficients that are applicable to the reaction system in this study. If the rate constants of some  $RO_2\cdot + RO_2\cdot$  reactions were higher than those used in MCM, the concentrations of  $RO_2\cdot$  would be lower and relative importance of  $RO_2\cdot + RO_2\cdot$  in  $RO_2\cdot$  fate would increase.”

● *Related to many of the points above, like expected behavior for primary and secondary products, the oxidation rates, and the  $RO_2$  fates, I suggest that you include some model results in a revised manuscript. For example, it would be very interesting to see how well the MCM run is able to match the measured  $NO_3$  and  $N_2O_5$  behavior, as well as limonene. Likewise, the  $RO_2$  concentrations should be included. If the main parameters are captured correctly, I would expect that model could nicely output the time series of  $NO_3$ \*limonene as well as  $NO_3$ \*Limonene\_oxidation\_products, as metrics to show the expected behavior of first and second generation products. If this type of model results match well with the observations (and interpretations), I would be much more convinced.*

**Response:**

In the original manuscript, we had run such an MCM model. In the revised manuscript, we have added a figure in the supplement presenting the results of MCM simulation (Fig. S16):

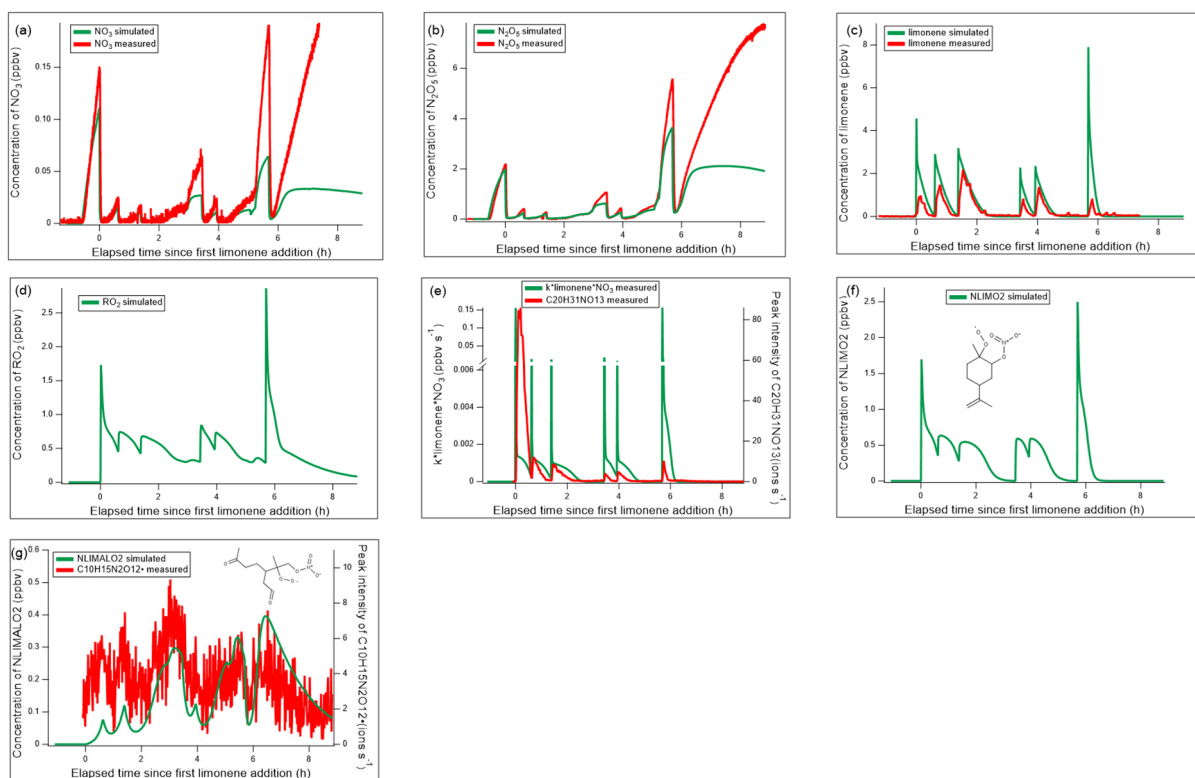

Figure S16. Simulation results of limonene + NO<sub>3</sub> gas-phase chemistry based on MCM v3.3.1 using iChamber model. The whole period of experiment was simulated, at measured T and RH, and additions of limonene, NO<sub>2</sub> and O<sub>3</sub> were included as initial conditions according to the experimental procedure. (a)–(c): Comparison of simulated (green trace) and measured (red trace) concentrations of (a) NO<sub>3</sub>, (b) N<sub>2</sub>O<sub>5</sub> and (c) limonene. (d)–(g): Simulated concentrations of (d) total RO<sub>2</sub>• included in the limonene + NO<sub>3</sub> gas-phase chemistry in MCM v3.3.1, (e) rate coefficient  $k \times \text{limonene} \times \text{NO}_3$ , compared with a measured 1<sup>st</sup>-generation product C<sub>20</sub>H<sub>31</sub>NO<sub>13</sub>; (f) “NLIMO2”, an example of 1<sup>st</sup>-generation C<sub>10</sub> RO<sub>2</sub>•, and (g) “NLIMALO2”, an example of 2<sup>nd</sup>-generation C<sub>10</sub> RO<sub>2</sub>•, compared with a measured 2<sup>nd</sup>-generation RO<sub>2</sub>•, C<sub>10</sub>H<sub>15</sub>N<sub>2</sub>O<sub>12</sub>•.

The modeled concentrations of NO<sub>3</sub>, N<sub>2</sub>O<sub>5</sub> and limonene by MCM generally match the behavior of measured concentrations (Fig. S16 a–c). The overestimated limonene concentrations can be attributed to the absence of a temperature-dependence of the rate constant for the reaction of limonene with NO<sub>3</sub> in MCM. RO<sub>2</sub>• concentrations showed 1<sup>st</sup>-generation trend (Fig. S16d). The reaction rate ( $k \times \text{limonene} \times \text{NO}_3$ ) was highest at every injection of limonene (Fig. S16e). As for oxidation products, the second time of NO<sub>3</sub> attack to organic nitrate with a C=C double bond is not included in MCM, so the simulation of the closed-shell products does not present 1<sup>st</sup> or 2<sup>nd</sup> generation product patterns as we have observed in CIMS. But we are able to observe several good simulations of 1<sup>st</sup> and 2<sup>nd</sup> generation RO<sub>2</sub>• (Fig. S16f,g). For example, the “NLIMALO2” (Fig. S16g) showed a typical time series of 2<sup>nd</sup> generation RO<sub>2</sub>•, which is formed via NO<sub>3</sub> attack of a 1<sup>st</sup>-generation carbonyl product which does not contain N atom according to the MCM mechanism.

In the revised manuscript, we have added more results of MCM in the supplement as follows:

### “S3 Simulations based on the Master Chemical Mechanism (MCM)

Besides simulations of the  $\text{RO}_2^\bullet$  loss pathway (Sect. 2.5), we conducted several simulations including concentrations of  $\text{NO}_3$ ,  $\text{N}_2\text{O}_5$ , limonene and  $\text{RO}_2^\bullet$  (Fig. S16) based on MCM v3.3.1 (<http://mcm.york.ac.uk/>) using iChamber, an open-source program (<https://sites.google.com/view/wangsiyuan/models?authuser=0>) (Wang and Pratt, 2017).

The modeled concentration of  $\text{NO}_3$ ,  $\text{N}_2\text{O}_5$  and limonene by MCM generally match the behavior of measured concentrations (Fig. S16 a~c). The overestimated limonene concentrations can be attributed to the absence of a temperature-dependent rate constant for the reaction of limonene with  $\text{NO}_3$ .  $\text{RO}_2^\bullet$  concentrations showed 1<sup>st</sup>-generation trend ((Fig. S16d). The reaction rate ( $k \times \text{limonene} \times \text{NO}_3$ ) was highest at every injection of limonene (Fig. S16e). As for oxidation products, the second time of  $\text{NO}_3$  attack to organic nitrate with a C=C double bond is not included in MCM, so the simulation of the closed-shell products does not present 1<sup>st</sup> or 2<sup>nd</sup> generation product patterns as we have observed in CIMS. But we are able to observe several good simulation of 1<sup>st</sup> and 2<sup>nd</sup> generation  $\text{RO}_2^\bullet$  (Fig. S16f,g). For example, the “NLIMALO2” (Fig. S16g) showed a typical time series of 2<sup>nd</sup> generation  $\text{RO}_2^\bullet$ , which is formed via  $\text{NO}_3$  attack of a 1<sup>st</sup>-generation carbonyl product which does not contain N atom according to the MCM mechanism.”

●The conclusion of the dimers and trimers being important for NPF because they only appear during P1 in Figs 5 and 6 is brought into question when considering that only the N2 dimers (shown in Fig 5) show this feature, while N1, N3 and N4 dimers (Figs S9-S11) all show relatively high concentrations also much later in the experiment, when the CS is far higher than during the transition from P1 to P2. In addition, I am skeptical to the particle concentration trace in Fig. 1b. It keeps increasing up until 2h, but the size distribution gives no indication of new particles being formed after the first hour. Instead, the size distribution seems to barely detect any particles below 20 nm, and the mode just appears at that size. I see no discussion on this point, but the obvious conclusion for me is that the detection limit of the SMPS is about 20 nm, and the particle concentration trace derived from that data is the concentration of particles larger than 20 nm. As such, the particle concentration has likely in reality been decreasing after the initial particle burst during the first minutes or tens of minutes of the experiment. This needs to be discussed.

#### Response:

We agree that N2 dimers show different patterns from N1, N3 and N4 dimers, which also showed relatively high concentration after P1. In the revised manuscript, we have modified the discussion regarding dimers as follows:

“Generally, other dimers showed similar patterns (Fig. S9-11), though the difference of their concentrations between P2-P6 and P1 were not as large as for the  $\text{C}_{20}\text{H}_{32}\text{N}_2\text{O}_x$  family. The time when signals of several

dimers (e.g.  $C_{20}H_{32}N_2O_x$ ,  $C_{20}H_{33}N_3O_x$ ,  $C_{20}H_{34}N_4O_x$ ) dropped substantially matched the time of new particle formation (NPF) and the onset of particle growth, indicating that some dimers were likely involved in the early growth of particles.”

As for the particle number concentration in Fig. 1b, we realized that only using the data from SMPS is inappropriate. We thank the reviewer for pointing out this limitation. In the revised manuscript, we also show the total number concentration detected by CPC (TSI-3785) which can detect particles over 5 nm. As the reviewer expected, the number concentration detected by CPC reached its peak earlier than that detected by SMPS, about 40 min after the first addition of limonene. For SMPS data, the smallest particle when particles started to appear is at ~15 nm, which can be more clearly seen after we have changed the color bar to log scale in the revised Fig. 1b. Since the size range of our SPMS starts from ~10 nm, this phenomenon is likely attributed to fast growth of new particles from below 10 nm to 15 nm within the time of one SMPS scan (3 min).

In addition, the particle number concentration detected by CPC provides further support of the important role of trimers in NPF. The time when particle number concentrations started to increase matches the time when trimer started to decrease.

The modified Fig. 1b in the revised manuscript is also shown below:

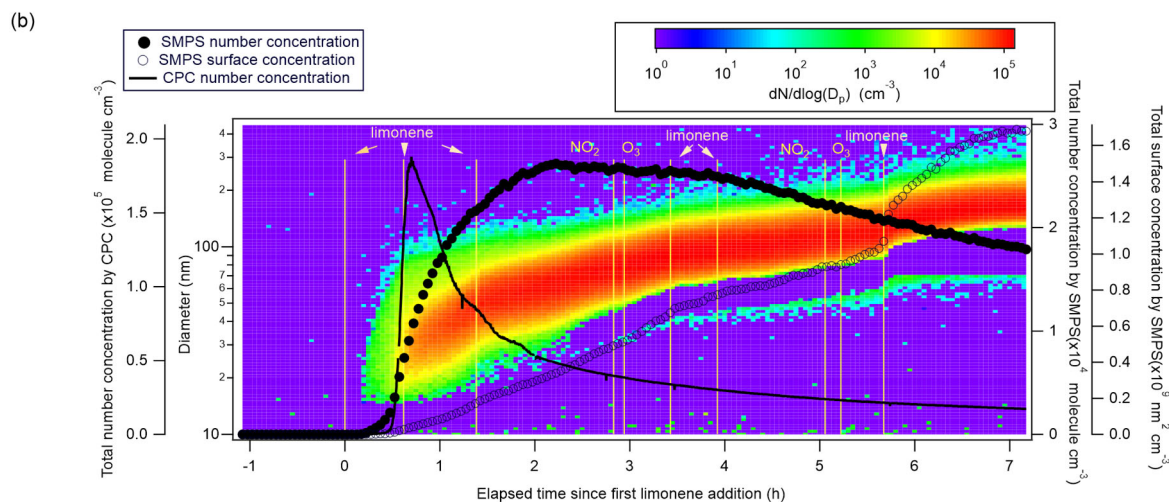

● Lines 317-319: “it is likely that  $C_{10}H_{16}NO_x$  radicals converted immediately after their formation”. This is a very broad statement, as it includes all radicals, including the primary  $O_5$  radical. If this was the case, Fig. S2 would no longer make any sense, since there would be no  $RO_2$  around. I would expect very low sensitivity for  $RO_2$  radicals with less than 7 O-atoms in the CIMS, and therefore a more likely scenario is perhaps that the primary  $RO_2$  either do not efficiently undergo autoxidation, or alternatively, that the  $RO_2$  lifetimes were so short that autoxidation was outcompeted.

**Response:**

By  $C_{10}H_{16}NO_x$  radicals, we meant HOM- $RO_2^\bullet$  radicals. We apologize for this ambiguity. In the revised manuscript, we have changed this to “HOM peroxy radicals  $C_{10}H_{16}NO_x^\bullet$  ( $x \geq 6$ )”.

We agree that  $RO_2^\bullet$  radicals as well as other HOM with less than 6 O-atoms have low sensitivity in the  $NO_3^-$ -CIMS (Riva et al., 2019), which had been stated in our original manuscript. Based on our measurement, we cannot constrain how fast the primary  $RO_2^\bullet$   $C_{10}H_{16}NO_5^\bullet$  autoxidizes. Regarding the absence of first-generation characteristic of the time profiles of most HOM peroxy radicals  $C_{10}H_{16}NO_{x(x \geq 6)}^\bullet$ , there are two possible reasons. One is that they did not undergo efficient autoxidation. The other is that they underwent immediate conversion including autoxidation and/or bimolecular reactions such as with other  $RO_2^\bullet$  or  $NO_3$  forming closed-shell products or continuing the radical chain to  $RO^\bullet$ . The instantaneous increase of 2N-dimers and trimers after the first limonene addition suggests that  $C_{10}H_{16}NO_{x(x \geq 6)}^\bullet$  were indeed formed efficiently via autoxidation. Therefore, we think that the latter reason is more likely. We have revised the original sentence as follows:

“The absence of first-generation characteristics of the time profile of most HOM peroxy radicals  $C_{10}H_{16}NO_{x(x \geq 6)}^\bullet$  may be attributed to two possible reasons. They either did not undergo efficient autoxidation, or they underwent immediate conversion including autoxidation and/or bimolecular reactions with other  $RO_2^\bullet$  or  $NO_3$  forming closed-shell products such as dimers or continuing the radical chain forming  $RO^\bullet$ . The instantaneous increase of 2N-dimers and trimers after the first limonene addition shown below suggests that  $C_{10}H_{16}NO_{x(x \geq 6)}^\bullet$  were indeed formed efficiently via autoxidation. Therefore, the latter reason is more likely.”

● Lines 452-453: “the most abundant  $C_{20}H_{32}N_2O_x$  was expected to have an oxygen number of 18 according to the accretion reaction mechanism”. At least I would not “expect” this, as seemingly all earlier studies discussing this topic have suggested that the dimers have lower O/C because the less oxidized  $RO_2$  radicals are involved. As you also cite 4 papers for this, the “expected” should be removed.

**Response:**

Accepted. We meant the “expected” formula if all dimer were formed by accretion reactions of only HOM  $RO_2^\bullet$ . In the revised manuscript, we have revised this sentence as follows:

“...the most abundant  $C_{20}H_{32}N_2O_x$  would have an oxygen number of 18 if they were exclusively formed by the accretion reaction of HOM  $RO_2^\bullet$ .”

We have also updated the references here to include only the papers that explicitly address whether less oxidized  $RO_2^\bullet$  radicals are involved in accretion reactions.



●Lines 570-571: “in the early stage of the experiment when new particle formation (NPF) had not occurred yet”. As I said earlier, the time when NPF occurred is not visible from your data, and likely happened much earlier than the SMPS concentrations indicates. In addition, you have said that trimers are the most likely candidates to initiate nucleation, and the trimers formed almost instantly, suggesting that NPF would also start immediately.

**Response:**

Accepted. In the revised manuscript, we have changed this sentence to:

“Dimers contributed 47 % in the early stage of the experiment when ~~new particle formation (NPF) had not occurred yet~~ particle surface concentration was rather low ( $< 6 \times 10^4 \text{ nm}^2 \text{ cm}^{-3}$ ), which was similar to monomers (47 %).”

●Line 605: How do you come to these numbers? At 1 ppb limonene, the lifetime should be  $< 5s$ .

**Response:**

This is a typo. We meant  $\text{RO}_2\bullet$  instead of  $\text{NO}_3$  and we have corrected this in the revised manuscript.

*Technical corrections*

●The term “SOA growth” is used several times in the abstract, and it is confusing to me, as would be terms like “sulfate growth” or “black carbon growth”.

**Response:**

The acronym SOA contains the word aerosol. That is different from the two examples given by the reviewer. Nevertheless, we have changed all the terms “SOA growth” to “growth of SOA particles”.

●Lines 179-180: I suggest not to mention this 14% uncertainty here, since it gives the picture that this is the total uncertainty, although that is given later.

**Response:**

We add the word “additional” to clarify this number:

“A mass-independent transmission efficiency was used according to our previous study, which causes an additional uncertainty of 14 %.”

●Use of%: In the abstract the Hom yield is given as “2.5 % (+1.7 %/-0.7 %)“. It is not trivial to understand this. I assume that it means 0.8-3.2 % as the uncertainty range, but more commonly +- X% would mean percentage and not percentage points. On line 183, are these percentages or percentage points?

**Response:**

We meant percentage points. In the revised manuscript, we have changed the form to superscripts and subscripts to avoid ambiguity:

“1.5 %<sup>+1.7 %</sup><sub>-0.7 %</sub>”

●Figure 3: An O-atom based Kendrick plot is unlikely to be obvious to the majority of readers. Please add somewhere a sentence about what the y-axis means.

**Response:**

The explanation of O-atom based Kendrick mass defect has been added in the annotation of Figure 3 in the revised manuscript as follows.

“The calculation of O-atom-based Kendrick mass defect includes two steps. First, the IUPAC mass scale (based on the <sup>12</sup>C atomic mass as exactly 12 Da) is rescaled to Kendrick mass: Kendrick mass = IUPAC mass × (16/15.9949), which converts the mass of O from 15.9949 to exactly 16. Then, Kendrick mass defect is given by: Kendrick mass defect = nominal Kendrick mass – exact Kendrick mass. Thus, compounds with the same number of each kind of atom except for O have equal O-atom-based Kendrick mass defect, and are shown in a horizontal line in the O-atom-based Kendrick mass defect plot.”

●Lines 358-360: What about the carbonyl formation from alkoxy radicals?

**Response:**

We have added this pathway and discussed it as follows:

“As discussed in our previous study by Shen et al. (2021), this higher abundance of carbonylnitrates is not likely to be explained by the reaction of alkoxy RO• + O<sub>2</sub> forming carbonyls and HO<sub>2</sub>•, decomposition of β-nitrooxyperoxynitrate or self-reactions of RO<sub>2</sub>• via the Bennett and Summers mechanism forming carbonyls and H<sub>2</sub>O<sub>2</sub>. Reactions between RO<sub>2</sub>• in general should produce overall equal amounts of carbonyl and hydroxyl compounds. The decomposition of β-nitrooxyperoxynitrate is slow in the gas-phase. The reaction of alkoxy RO• with O<sub>2</sub> for large RO• is generally slower than isomerization and decomposition (Vereecken

and Peeters, 2009, 2010). Thus, the higher abundance of carbonylnitrates compared to hydroxynitrates may be attributed to unimolecular termination of HOM-RO<sub>2</sub>•. In addition, isomerization of RO• forming carbonyl compounds may also contribute to this finding.”

●Figure 5: Why is the peak intensity on the right axis in the top panel? It seems strange to me, and it took me a long while to realize what the arrows in the plot meant.

**Response:**

In the revised manuscript, we have moved the peak intensity to the left axis.

●Lines 447-448: While correct, this sentence seems to suggest a causality opposite to what one would expect.

**Response:**

We wrote this sentence simply to state our observation based on the time profile of C<sub>20</sub>H<sub>32</sub>N<sub>2</sub>O<sub>x</sub> rather than suggest a causality. In the revised manuscript, we have revised this sentence as follows:

“The relative contribution of second-generation formation was observed to increase with increasing oxygen number.”

●Line 582: I think “N” is missing.

**Response:**

We thank the reviewer for pointing out this typo. It should be C<sub>10</sub>H<sub>16</sub>NO<sub>5</sub>•.

●Line 609: “Volatile commercial products”?

**Response:**

VCP is the abbreviation for volatile chemical products, which can be referred to work of McDonald et al. (2018).

**References**

Bates, K. H., Burke, G. J. P., Cope, J. D., and Nguyen, T. B.: Secondary organic aerosol and organic nitrogen

- yields from the nitrate radical (NO<sub>3</sub>) oxidation of alpha-pinene from various RO<sub>2</sub> fates, *Atmos. Chem. Phys.*, **22**, 1467-1482, 10.5194/acp-22-1467-2022, 2022.
- Bell, D. M., Wu, C., Bertrand, A., Graham, E., Schoonbaert, J., Giannoukos, S., Baltensperger, U., Prevot, A. S. H., Riipinen, I., El Haddad, I., and Mohr, C.: Particle-phase processing of  $\alpha$ -pinene NO<sub>3</sub> secondary organic aerosol in the dark, *Atmos. Chem. Phys. Discuss.*, 2021, 1-28, 10.5194/acp-2021-379, 2021.
- Berndt, T., Mender, B., Scholz, W., Fischer, L., Herrmann, H., Kulmala, M., and Hansel, A.: Accretion Product Formation from Ozonolysis and OH Radical Reaction of  $\alpha$ -Pinene: Mechanistic Insight and the Influence of Isoprene and Ethylene, *Environ. Sci. Technol.*, **52**, 11069-11077, 10.1021/acs.est.8b02210, 2018.
- Boyd, C. M., Sanchez, J., Xu, L., Eugene, A. J., Nah, T., Tuet, W. Y., Guzman, M. I., and Ng, N. L.: Secondary organic aerosol formation from the  $\beta$ -pinene+NO<sub>3</sub> system: effect of humidity and peroxy radical fate, *Atmos. Chem. Phys.*, **15**, 7497-7522, 10.5194/acp-15-7497-2015, 2015.
- Clafin, M. S. and Ziemann, P. J.: Identification and Quantitation of Aerosol Products of the Reaction of  $\beta$ -Pinene with NO<sub>3</sub> Radicals and Implications for Gas- and Particle-Phase Reaction Mechanisms, *J. Phys. Chem. A*, **122**, 3640-3652, 10.1021/acs.jpca.8b00692, 2018.
- Dam, M., Draper, D. C., Marsavin, A., Fry, J. L., and Smith, J. N.: Observations of gas-phase products from the nitrate-radical-initiated oxidation of four monoterpenes, *Atmos. Chem. Phys.*, **22**, 9017-9031, 10.5194/acp-22-9017-2022, 2022.
- Ehn, M., Thornton, J. A., Kleist, E., Sipilä, M., Junninen, H., Pullinen, I., Springer, M., Rubach, F., Tillmann, R., Lee, B., Lopez-Hilfiker, F., Andres, S., Acir, I. H., Rissanen, M., Jokinen, T., Schobesberger, S., Kangasluoma, J., Kontkanen, J., Nieminen, T., Kurtén, T., Nielsen, L. B., Jørgensen, S., Kjaergaard, H. G., Canagaratna, M., Dal Maso, M., Berndt, T., Petäjä, T., Wahner, A., Kerminen, V. M., Kulmala, M., Worsnop, D. R., Wildt, J., and Mentel, T. F.: A large source of low-volatility secondary organic aerosol, *Nature*, **506**, 476-485, 10.1038/nature13032, 2014.
- Faxon, C., Hammes, J., Le Breton, M., Pathak, R. K., and Hallquist, M.: Characterization of organic nitrate constituents of secondary organic aerosol (SOA) from nitrate-radical-initiated oxidation of limonene using high-resolution chemical ionization mass spectrometry, *Atmos. Chem. Phys.*, **18**, 5467-5481, 10.5194/acp-18-5467-2018, 2018.
- Fuchs, H., Hofzumahaus, A., Rohrer, F., Bohn, B., Brauers, T., Dorn, H. P., Haeseler, R., Holland, F., Kaminski, M., Li, X., Lu, K., Nehr, S., Tillmann, R., Wegener, R., and Wahner, A.: Experimental evidence for efficient hydroxyl radical regeneration in isoprene oxidation, *Nat. Geosci.*, **6**, 1023-1026, 10.1038/ngeo1964, 2013.
- Jenkin, M. E., Saunders, S. M., and Pilling, M. J.: The tropospheric degradation of volatile organic compounds: A protocol for mechanism development, *Atmos. Environ.*, **31**, 81-104, 10.1016/s1352-2310(96)00105-7, 1997.
- Krechmer, J. E., Pagonis, D., Ziemann, P. J., and Jimenez, J. L.: Quantification of Gas-Wall Partitioning in Teflon Environmental Chambers Using Rapid Bursts of Low-Volatility Oxidized Species Generated in Situ, *Environ. Sci. Technol.*, **50**, 5757-5765, 10.1021/acs.est.6b00606, 2016.
- Kulmala, M., Petäjä, T., Nieminen, T., Sipilä, M., Manninen, H. E., Lehtipalo, K., Dal Maso, M., Aalto, P. P., Junninen, H., Paasonen, P., Riipinen, I., Lehtinen, K. E. J., Laaksonen, A., and Kerminen, V.-M.: Measurement of the nucleation of atmospheric aerosol particles, *Nat. Protoc.*, **7**, 1651-1667, 10.1038/nprot.2012.091, 2012.
- Lee, B. H., Mohr, C., Lopez-Hilfiker, F. D., Lutz, A., Hallquist, M., Lee, L., Romer, P., Cohen, R. C., Iyer, S., Kurten, T., Hu, W., Day, D. A., Campuzano-Jost, P., Jimenez, J. L., Xu, L., Ng, N. L., Guo, H., Weber, R. J., Wild, R. J., Brown, S. S., Koss, A., de Gouw, J., Olson, K., Goldstein, A. H., Seco, R., Kim, S.,

- McAvey, K., Shepson, P. B., Starn, T., Baumann, K., Edgerton, E. S., Liu, J., Shilling, J. E., Miller, D. O., Brune, W., Schobesberger, S., D'Ambro, E. L., and Thornton, J. A.: Highly functionalized organic nitrates in the southeast United States: Contribution to secondary organic aerosol and reactive nitrogen budgets, *P. Natl. Acad. Sci. USA*, 113, 1516-1521, 10.1073/pnas.1508108113, 2016.
- Massoli, P., Stark, H., Canagaratna, M. R., Krechmer, J. E., Xu, L., Ng, N. L., Mauldin, R. L., Yan, C., Kimmel, J., Misztal, P. K., Jimenez, J. L., Jayne, J. T., and Worsnop, D. R.: Ambient Measurements of Highly Oxidized Gas-Phase Molecules during the Southern Oxidant and Aerosol Study (SOAS) 2013, *ACS Earth Space Chem.*, 2, 653-672, 10.1021/acsearthspacechem.8b00028, 2018.
- McDonald, B. C., de Gouw, J. A., Gilman, J. B., Jathar, S. H., Akherati, A., Cappa, C. D., Jimenez, J. L., Lee-Taylor, J., Hayes, P. L., McKeen, S. A., Cui, Y. Y., Kim, S.-W., Gentner, D. R., Isaacman-VanWertz, G., Goldstein, A. H., Harley, R. A., Frost, G. J., Roberts, J. M., Ryerson, T. B., and Trainer, M.: Volatile chemical products emerging as largest petrochemical source of urban organic emissions, 359, 760-764, 10.1126/science.aag0524 %J Science, 2018.
- Nah, T., Sanchez, J., Boyd, C. M., and Ng, N. L.: Photochemical Aging of  $\alpha$ -pinene and  $\beta$ -pinene Secondary Organic Aerosol formed from Nitrate Radical Oxidation, *Environ. Sci. Technol.*, 50, 222-231, 10.1021/acs.est.5b04594, 2016.
- Nazaroff, W. W. and Weschler, C. J.: Cleaning products and air fresheners: exposure to primary and secondary air pollutants, *Atmos. Environ.*, 38, 2841-2865, 10.1016/j.atmosenv.2004.02.040, 2004.
- Peräkylä, O., Riva, M., Heikkinen, L., Quéléver, L., Roldin, P., and Ehn, M.: Experimental investigation into the volatilities of highly oxygenated organic molecules (HOMs), *Atmos. Chem. Phys.*, 20, 649-669, 10.5194/acp-20-649-2020, 2020.
- Pullinen, I., Schmitt, S., Kang, S., Sarrafzadeh, M., Schlag, P., Andres, S., Kleist, E., Mentel, T. F., Rohrer, F., Springer, M., Tillmann, R., Wildt, J., Wu, C., Zhao, D., Wahner, A., and Kiendler-Scharr, A.: Impact of NO<sub>x</sub> on secondary organic aerosol (SOA) formation from  $\alpha$ -pinene and  $\beta$ -pinene photooxidation: the role of highly oxygenated organic nitrates, *Atmos. Chem. Phys.*, 20, 10125-10147, 10.5194/acp-20-10125-2020, 2020.
- Riva, M., Rantala, P., Krechmer, J. E., Peräkylä, O., Zhang, Y., Heikkinen, L., Garmash, O., Yan, C., Kulmala, M., Worsnop, D., and Ehn, M.: Evaluating the performance of five different chemical ionization techniques for detecting gaseous oxygenated organic species, *Atmos. Meas. Tech.*, 12, 2403-2421, 10.5194/amt-12-2403-2019, 2019.
- Saunders, S. M., Jenkin, M. E., Derwent, R. G., and Pilling, M. J.: Protocol for the development of the Master Chemical Mechanism, MCM v3 (Part A): tropospheric degradation of non-aromatic volatile organic compounds, *Atmos. Chem. Phys.*, 3, 161-180, 2003.
- Shen, H., Zhao, D., Pullinen, I., Kang, S., Vereecken, L., Fuchs, H., Acir, I.-H., Tillmann, R., Rohrer, F., Wildt, J., Kiendler-Scharr, A., Wahner, A., and Mentel, T. F.: Highly Oxygenated Organic Nitrates Formed from NO<sub>3</sub> Radical-Initiated Oxidation of  $\beta$ -Pinene, *Environ. Sci. Technol.*, 10.1021/acs.est.1c03978, 2021.
- Vereecken, L. and Peeters, J.: Decomposition of substituted alkoxy radicals-part I: a generalized structure-activity relationship for reaction barrier heights, *Phys. Chem. Chem. Phys.*, 11, 9062-9074, 10.1039/b909712k, 2009.
- Vereecken, L. and Peeters, J.: A structure-activity relationship for the rate coefficient of H-migration in substituted alkoxy radicals, *Phys. Chem. Chem. Phys.*, 12, 12608-12620, 10.1039/c0cp00387e, 2010.
- Wang, S. and Pratt, K. A.: Molecular Halogens Above the Arctic Snowpack: Emissions, Diurnal Variations, and Recycling Mechanisms, *J. Geophys. Res.-Atmos.*, 122, 11991-12007, 10.1002/2017jd027175, 2017.
- Wu, C., Bell, D. M., Graham, E. L., Haslett, S., Riipinen, I., Baltensperger, U., Bertrand, A., Giannoukos, S.,

- Schoonbaert, J., El Haddad, I., Prevot, A. S. H., Huang, W., and Mohr, C.: Photolytically induced changes in composition and volatility of biogenic secondary organic aerosol from nitrate radical oxidation during night-to-day transition, *Atmos. Chem. Phys.*, 21, 14907-14925, 10.5194/acp-21-14907-2021, 2021.
- Yan, C., Nie, W., Äijälä, M., Rissanen, M. P., Canagaratna, M. R., Massoli, P., Junninen, H., Jokinen, T., Sarnela, N., Häme, S. A. K., Schobesberger, S., Canonaco, F., Yao, L., Prévôt, A. S. H., Petäjä, T., Kulmala, M., Sipilä, M., Worsnop, D. R., and Ehn, M.: Source characterization of highly oxidized multifunctional compounds in a boreal forest environment using positive matrix factorization, *Atmos. Chem. Phys.*, 16, 12715-12731, 10.5194/acp-16-12715-2016, 2016.
- Zhao, D., Pullinen, I., Fuchs, H., Schrade, S., Wu, R., Acir, I.-H., Tillmann, R., Rohrer, F., Wildt, J., Guo, Y., Kiendler-Scharr, A., Wahner, A., Kang, S., Vereecken, L., and Mentel, T. F.: Highly oxygenated organic molecule (HOM) formation in the isoprene oxidation by NO<sub>3</sub> radical, *Atmos. Chem. Phys.*, 21, 9681-9704, 10.5194/acp-21-9681-2021, 2021.
- Zhao, D., Schmitt, S. H., Wang, M., Acir, I.-H., Tillmann, R., Tan, Z., Novelli, A., Fuchs, H., Pullinen, I., Wegener, R., Rohrer, F., Wildt, J., Kiendler-Scharr, A., Wahner, A., and Mentel, T. F.: Effects of NO<sub>x</sub> and SO<sub>2</sub> on the secondary organic aerosol formation from photooxidation of  $\alpha$ -pinene and limonene, *Atmos. Chem. Phys.*, 18, 1611-1628, 10.5194/acp-18-1611-2018, 2018.
- Ziemann, P. J. and Atkinson, R.: Kinetics, products, and mechanisms of secondary organic aerosol formation, *Chem. Soc. Rev.*, 41, 6582-6605, 10.1039/c2cs35122f, 2012.
